1     **Impact of Exercise-induced Dehydration on Perceived Exertion During Endurance**  
2                     **Exercise: A Systematic Review with Meta-analysis**

3

4     Thomas A. Deshayes<sup>1,2</sup>, Timothée Pancrate<sup>1</sup>, Eric D.B. Goulet<sup>1,2\*</sup>

5

6     <sup>1</sup> Faculty of physical activity sciences, University of Sherbrooke, P.Q., J1K 2R1, Canada

7     <sup>2</sup> Research Center on Aging, University of Sherbrooke, P.Q., J1H 4C4, Canada

8

9     **Running head:** Impact of Exercise-induced Dehydration on Perceived Exertion

10

11     **Authors ORCIDs**

12     Deshayes: 0000-0002-7620-1939

13     Goulet: 0000-0001-5117-9977

14     Pancrate: 0000-0002-4161-5875

15

16

17

18

19

20     **Correspondence:** Eric D.B. Goulet, Ph.D.

21                     Performance, Hydration and Thermoregulation Laboratory

22                     University of Sherbrooke

23                     2500 boul. de l'Université

24                     Sherbrooke, Québec, Canada

25                     J1K 2R1

26                     E-mail: [eric.goulet@usherbrooke.ca](mailto:eric.goulet@usherbrooke.ca)

27                     Phone number: 1-819-821-8000 \*62728

28                     Fax number: 1-819-821-7970

29

30

31 **Abstract**

32 Understanding the impact of stressors on the rating of perceived exertion (RPE) is  
33 relevant from a performance and exercise adherence/participation standpoint. Athletes  
34 and recreationally active individuals dehydrate during exercise. No attempt has been  
35 made to systematically determine the impact of exercise-induced dehydration (EID) on  
36 RPE. The present meta-analysis aimed to determine the effect of EID on RPE during  
37 endurance exercise and examine the moderating effect of potential confounders using a  
38 meta-analytical approach. Data analyses were performed on raw RPE values using  
39 random-effects models weighted mean effect summaries and meta-regressions with  
40 robust standard errors, and with a practical meaningful effect set at 1 point difference  
41 between euhydration (EUH) and EID. Only controlled crossover studies measuring RPE  
42 with a Borg scale in healthy adults performing  $\geq 30$  min of continuous endurance  
43 exercise while dehydrating or drinking to maintain EUH were included. Sixteen studies  
44 were included, representing 147 individuals. Mean body mass loss with EUH was  $0.5 \pm$   
45  $0.4\%$ , compared to  $2.3 \pm 0.5\%$  with EID (range 1.7 to 3.1%). Within an EID of 0.5 to 3%  
46 body mass, a maximum difference in RPE of 0.81 points (95% CI: 0.36-1.27) was  
47 observed between conditions. A meta-regression revealed that RPE increases by 0.21  
48 points for each 1% increase in EID (95% CI: 0.12-0.31). Humidity, ambient temperature  
49 and aerobic capacity did not alter the relationship between EID and RPE. Therefore, the  
50 effect of EID on RPE is unlikely to be practically meaningful until a body mass loss of at  
51 least 3%.

52 **Keywords:** hydration, hypohydration, performance, rating of perceived exertion, RPE

53

## 54 **INTRODUCTION**

55 Rating of perceived exertion (RPE), a subjective estimation of the intensity or difficulty  
56 of a physical task, is widely used by professionals in the field of exercise sciences,  
57 coaching and sports medicine to monitor or prescribe exercise intensity (87). Developed  
58 by Gunnar Borg (19, 20), the Borg RPE scale is a universally accessible, comprehensible,  
59 useful, non-invasive, valid and inexpensive tool that can be used in diverse populations  
60 such as in children, adolescents, young and older adults, and under different conditions,  
61 including leisure and elite sports, clinical rehabilitation and scientific research. Although  
62 the etiology of RPE is unclear, it is proposed that it is either centrally derived (64) or  
63 generated by neuronal processes that integrate afferent signals from various peripheral  
64 and central sources, as well as from psychological factors (20, 88).

65 The RPE is a pivotal component of aerobic exercise. Indeed, it acts as a regulator of  
66 exercise intensity (1, 93) and exercise duration (26, 35, 77) and, thus, modulates exercise  
67 capacity in competitive athletes and, as important, is at the core of the decision to engage  
68 and adhere to the regular practice of physical activity among recreationally active  
69 individuals (32, 33). Given that physiological and psychological signals can act  
70 individually or in concert to disturb RPE, it follows that limiting the number of  
71 physiological or emotional stressors to a minimum during exercise should ensure optimal  
72 performance for the athlete and lead to a sense of fulfillment in recreationally active  
73 individuals (1).

74 Depending on a host of factors, sweat losses typically reach 0.5 to 1.7 L/h during exercise  
75 (13). Athletes as well as recreationally active individuals do not usually replace all their  
76 fluid losses during exercise. Exercise-induced dehydration (EID), best represented by the

77 acute body mass loss accrued during exercise, alters thermoregulatory, metabolic and  
78 cardiovascular functions (24, 43, 62, 63, 71), more particularly in individuals with low  
79 aerobic fitness (69) and may predispose to the development of thirst, headaches,  
80 tiredness, mental fatigue (44) and impaired mood (6, 39), while its impact upon cognitive  
81 performance is still debated (45). These factors may contribute to increasing RPE during  
82 exercise, ultimately impeding exercise performance in athletes (55) and potentially  
83 decreasing exercise adherence and participation in recreationally active individuals (33,  
84 82) which, from a societal and health perspective, is not suitable. Indeed, both the  
85 affective response and RPE are associated with long-term physical activity participation  
86 (97).

87 The relationship between EID and RPE has received much scientific attention, with some  
88 studies showing that EID can significantly increase RPE (2, 14, 16, 37, 38, 42, 43, 54, 56,  
89 62, 63, 71, 72, 75, 95, 99), while others did not (8, 12, 17, 28, 30, 31, 34, 40, 51, 53, 59,  
90 61, 68, 73, 74, 84, 89). At this time, no attempt has been made to systematically  
91 determine the impact of EID on RPE. Discrepancies between findings could potentially  
92 be related to methodological differences among studies, albeit this remains to be  
93 determined and confirmed with the aid of relevant analyses.

94 Efforts have yet to be deployed to determine, using a meta-analytic approach, the impact  
95 of EID on RPE. More specifically, there is a need to answer these questions: 1) does the  
96 change in RPE during exercise relate to EID?; 2) what is the magnitude of the effect of  
97 EID on RPE across different levels of EID; 3) is the magnitude of the effect of EID on  
98 RPE practically important?; 4) are there any identifiable factors among ambient  
99 temperature, humidity level, exercise intensity, exercise duration and aerobic capacity

100 that may moderate the relationship between EID and RPE and; 5) to which extent  
101 “cardiovascular strain” mediates the relationship between EID and RPE? The goal of this  
102 study, therefore, is to use a meta-analytic approach to provide answers to the above-  
103 mentioned questions. Findings will be valuable to scientists, physical trainers, sports  
104 nutritionists, physicians, exercise physiologists, sports psychologists and any individuals  
105 engaged in regular exercise. Also, such findings will be valuable to elucidate whether the  
106 changes in body water are part of an integrated signal.

107

## 108 **METHODS**

### 109 *Experimental approach to the problem*

110 Although the relationship between EID and RPE has received scientific attention, results  
111 are controversial. No attempt has been made to summarize and determine the magnitude  
112 of changes in RPE across different levels of EID. Such a gap indicates a need to use a  
113 systematic approach with meta-analysis to further our understanding of the relationship  
114 between these variables.

115 Figure 1 reports the search strategy used for study selection. The literature search, limited  
116 to original peer-reviewed articles published in French or English, was performed with the  
117 PubMed, MEDLINE, SPORTDiscus, AMED and CINAHL databases, combining a “title  
118 field” and an “abstract field” research using the following keywords alone or in  
119 combination: cycling, dehydration, drink, effort, endurance, euhydration, exercise,  
120 exertion, fluid, hydration, hypohydration, perceived effort, perceived exertion,  
121 perception, performance, rate of perceived exertion, rating of perceived exertion, RPE  
122 and running. The exact search strategy can be found in supplementary material 1. A first

123 selection based on the title was performed; afterward, the abstract and method sections of  
124 all potential articles were read. When hydration status was manipulated and RPE  
125 measured, the methodological section was carefully read to verify eligibility. Published  
126 abstracts, case studies, non-peer-review manuscripts and conference proceedings were  
127 not considered. Cross-referencing was performed on included studies and 6  
128 narrative/systematic reviews (3, 23, 48, 55, 66, 79). When needed, authors of included  
129 studies were contacted and asked to share experimental raw data. The last search of the  
130 literature was done on December 17, 2020. The review and the protocol were not  
131 registered. The meta-analysis was conducted using the Preferred Reporting Items for  
132 Systematic Reviews and Meta-analysis (PRISMA) guidelines.

133

134 *Figure 1 about here*

135

### 136 ***Criteria for considering studies for inclusion in the meta-analysis***

137 Inclusion criteria were: (1) controlled study using a randomized crossover design in  
138 healthy adults ( $\geq 18$  years old); (2)  $\geq 30$  min of continuous running or cycling endurance  
139 exercise; (3) final EID in the experimental group  $> 1\%$  of pre-exercise body mass and  $\geq$   
140  $0.5\%$  than the euhydrated (EUH) control condition; (4) dehydration progressively  
141 induced during, not before exercise (46); (5) body mass change with EUH was within  $-1$   
142 to  $+0.5\%$  of the pre-exercise body mass (46); (6) fluid replacement was given orally; (7)  
143 if carbohydrates (CHO) or caffeine were provided during exercise, the amount was  
144 identical between conditions (9, 29) and; (8) data required to compute changes in EID  
145 and RPE included. Exclusion criteria were: (1) sports-specific and intermittent exercises;

146 (2) use of diuretics or sweatsuit to accelerate EID; (3) provision of fluid according to  
147 thirst sensation; (4) uncontrolled ambient conditions or experimentation timing; (5)  
148 collection of muscle biopsies and; (6) carrying of loads during exercise.

149

#### 150 *Assessment of trial quality*

151 No specific and validated tool to assess the quality of exercise-related studies has been  
152 developed. Moreover, assessing trial quality in meta-analyses using a scale can influence  
153 the interpretation of results (57). Hence, trial quality assessment was not performed in the  
154 present meta-analysis.

155

#### 156 *Data extraction*

157 Using double data entry, data regarding (1) study characteristics; (2) participants  
158 characteristics; (3) exercise protocol characteristics; (4) EID levels and; (5) RPE were  
159 extracted and coded in spreadsheets. When not provided by authors, data only available  
160 in figures were extracted using WebPlotDigitizer.

161

#### 162 *Exercise duration and intensity and participants' $\dot{V}O_{2max}$*

163 Exercise duration was computed as the average exercise time completed during both the  
164 EID and EUH conditions. Exercise intensity was taken as the average of the mean %  
165  $\dot{V}O_{2max}$  at which both the EID and EUH conditions were performed. Mean exercise  
166 intensity was computed using a weighted average for those studies that used a  
167 combination of exercise intensities. When not measured by authors, exercise intensity  
168 was estimated and computed as explained by Goulet (46). Most studies (4, 8, 16, 25, 31,

169 38, 68, 74, 75, 84, 89, 94, 95, 98) reported participants'  $\dot{V}O_{2\max}$ ; Barwood, Goodall and  
170 Bateman (15) and Dugas, Oosthuizen, Tucker, et al. (30) did not, and these values were  
171 calculated as in Goulet (46).

172

### 173 ***Fluid intake, exercise-induced dehydration and dehydration rate measurement***

174 Hydration rate (mL/min) was computed as the total amount of fluid intake divided by  
175 exercise duration, with the relative hydration rate (mL/min/kg) corrected for pre-exercise  
176 body mass (kg). The percent change in body mass from the pre- to post-exercise period  
177 was used as an index of the level of dehydration incurred during exercise. While this  
178 index is an imperfect representation of EID (65) as it is impacted by both metabolic water  
179 production and gas exchange during exercise, measurement error is relatively low  
180 amounting to an overestimation of fluid loss of ~ 100 mL/h during moderate intensity  
181 exercise.

182 When not provided, pre-exercise body mass was taken as that provided in the sample  
183 description, whereas % body mass loss was computed using the following equation:

$$184 \frac{\text{Pre-exercise body mass (kg)} - \text{post-exercise body mass (kg)}}{\text{pre-exercise body mass (kg)}} \times 100$$

185 x  
186 (1)

187 Thus, any positive value represents a body mass loss while negative values indicate body  
188 mass gain.

189 Assuming a high repeatability of (11), and consistency in (60), sweating rate and thus  
190 body mass loss (22) during exercise at a given intensity, dehydration rate (% body mass  
191 loss/min) was computed as follows:



192 End of exercise body mass loss (%) / exercise duration (min)  
193 (2)

194 Dehydration rate was used to calculate the % body mass loss associated with each  
195 measurement of RPE within a single study. For example, if in a study RPE was measured  
196 at 30, 60 and 90 min and the dehydration rate was 0.03%/min, therefore the  
197 corresponding % body mass losses were respectively taken as 0.9 (ex., 30 min x  
198 0.03%/min), 1.8 and 2.7%. In some studies, this iteration process had to be stopped when  
199 body mass loss surpassed 1% in the EUH condition (8, 31, 38, 74, 94). This procedure  
200 enabled us to pinpoint the behavior of RPE across a wide range of % body mass loss  
201 changes, using research data available from all included studies. To provide a practical,  
202 easy to understand and clear visual characterization of the effect of body mass loss on  
203 RPE during exercise, Figures 2a and b present the relationship between % body mass loss  
204 and RPE at fixed and anchored body mass loss levels, according to the classification  
205 presented in Table 1.

206

207 *Table 1 about here*

208

### 209 ***Measurement of perceived exertion during exercise***

210 Perceived exertion data are presented according to the original 6-20 Borg scale. Dugas,  
211 Oosthuizen, Tucker, et al. (30) and Walsh, Noakes, Hawley, et al. (95) used the Borg-  
212 CR10 scale (range 0-10); for those studies, RPE was converted back to the 6-20 scale  
213 according to Arney, Glover, Fusco, et al. (7). For Barwood, Goodall and Bateman (15)  
214 (hot and cold drink conditions), Dugas, Oosthuizen, Tucker, et al. (30) (0, 33 and 66%

215 conditions) and Murray, Michael and McClellan (75) (5- and 10-min conditions) merging  
216 of experiments were performed to eliminate data dependency.

217

### 218 *Moderating variables*

219 The following variables were *a priori* identified as potential moderators for the  
220 relationship between RPE and EID: ambient temperature, relative humidity, exercise  
221 duration and intensity and participants'  $\dot{V}O_{2max}$ . Ambient temperature and relative  
222 humidity are interdependent, as are exercise intensity and duration. To take this into  
223 account, absolute humidity and a composite score of exercise stress (product of exercise  
224 intensity (%  $\dot{V}O_{2max}$ ) and exercise duration (min)) were also considered as moderating  
225 variables.

226

### 227 *Mediating variable*

228 Heart rate was considered a potential mediating variable regarding the relationship  
229 between EID and RPE. Core temperature would have been another one to consider, but  
230 the paucity of data prevented us from evaluating its impact. For each study, mean  
231 exercise heart rate difference between the EUH and EID conditions was computed by  
232 averaging the sum of the heart rate difference computed at each measurement point.

233

### 234 *Statistical analyses*

#### 235 *Software*

236 Data were analyzed in their original form using Microsoft Office Excel 2020 (version  
237 1902, Redmond, WA, USA), MetaXL, Comprehensive Meta-Analysis (version 2.2.064,

238 Englewood, NJ, USA), STATA/MP (version 14, College Station, TX, USA), SPSS  
239 macros provided by Lipsey and Watson (46, 47) and IBM SPSS Statistics (version 21,  
240 Armonk, NY, USA) software.

241

#### 242 Weighted mean effect summaries

243 Each of the studies included in the meta-analysis took measurements of RPE during  
244 exercise at more than one EID level. Therefore, a meta-analysis of repeated measures was  
245 performed in an effort to limit the violation of the assumption of data independence in the  
246 data structure (85). First, an all-points forest plot was constructed to determine the mean  
247 effect of EID on RPE at body mass loss levels fixed and anchored at 0.5, 1, 1.5, 2, 2.5  
248 and 3%. This method allows us to illustrate the rate of increase in RPE across this range  
249 of body mass losses. Moreover, it allows for more precision in establishing the  
250 relationship between RPE and body mass loss as this strategy increases the  $n$  for any  
251 dehydration point. All RPE data within a given EID level were independent of each  
252 other; however, each study contributed in providing RPE-related data to more than one  
253 EID level. Nevertheless, the assumption of independence was protected for each of the  
254 EID levels. Post-hoc analyses were done using the False Discovery Rate procedure, with  
255 the number of *a priori* defined comparisons taken as 6, mirroring each of the EID levels  
256 compared. Second, to establish the mean effect of EID on RPE for each increase in 1%  
257 body mass loss, a forest plot was constructed from the slope estimates of the relationships  
258 between EID and RPE for each of the included studies, using non-weighted linear  
259 regression analyses with the intercepts forced through the origin (85). For this forest plot,  
260  $n$  was taken as the number of EID levels included in the regression analysis. Initially, the

261 analyses were performed separately by subgroups. However, data from studies using  
262 time-trial type exercise protocols were combined with those using fixed-intensity exercise  
263 protocols given the low number of studies using time-trial type exercise and because  
264 variations in RPE within the different EID levels were similar and, in all instances, < 1  
265 point. Nonetheless, on few occasions, analyses excluding time-trial type exercises will be  
266 presented when deemed interesting. Weighted mean effect summaries were determined  
267 using method of moment random-effects model. A more intuitive approach was used to  
268 verify whether it would change the outcomes in comparison to our approach. For that, we  
269 averaged, within a given hydration condition, all RPE measurements across time, and  
270 then observed the difference in RPE between conditions.

271

#### 272 Practical significance of the weighted mean effect summaries and slope estimate

273 The qualitative interpretation of the practical significance of the effect of EID on RPE  
274 was performed as in Goulet & Hoffman (48). Previous studies observed reliability of the  
275 RPE scale to be < 1 point (41, 58). Because the minimal increment of the scale is 1 point,  
276 this threshold was taken and accepted as the smallest worthwhile practical difference in  
277 RPE.

278

#### 279 Heterogeneity, publication bias and sensitivity analysis

280 Cochran's Q and I<sup>2</sup> statistic were both used to assess between-study heterogeneity and the  
281 degree of inconsistency among results of included studies. Cochran's Q test was  
282 considered significant at  $p \leq 0.1$  (18). The following classification was used to interpret  
283 the I<sup>2</sup> statistic: low (< 40%), moderate (40-59%), substantial (> 60%) (52). Publication

284 bias was performed using visual assessment of funnel plots with Trim and Fill  
285 adjustments. A sensitivity analysis was performed on each of the forest plots by removing  
286 each study once from the models to determine whether this would change the magnitude  
287 of the outcome summaries.

288

### 289 Meta-regression analyses

290 The potential mediating effect of heart rate and moderating effect of the *a priori* defined  
291 confounders were determined by regressing the slope estimates upon the mean heart rate  
292 difference between conditions or each of the confounders, respectively. Confounder and  
293 mediator variables included at least 10 data points from 10 different studies. A multiple  
294 meta-regression combining all moderators (with the exception of absolute humidity and  
295 composite score of exercise stress) was performed to understand the strength of our  
296 proposed model. Meta-regression analyses were performed using method of moment  
297 random-effects model, with 95% robust (Huber-Eicher-White-sandwich) standard errors.

298

### 299 Statistical significance

300 Otherwise stated, in all instances, results were considered significant at  $p < 0.05$  or when  
301 the 95% confidence interval did not include 0.

302

### 303 Variance computations

304 When raw data were obtained from the authors, variances were directly calculated from  
305 the  $\Delta$  standard errors or standard deviations of the absolute changes in RPE between  
306 conditions. Otherwise, individual variances for changes in RPE were estimated as in

307 Goulet and Hoffman (48) using an imputed weighted correlation coefficient of 0.81  
308 deriving from 40 correlation coefficients obtained from 5 different studies whose authors  
309 provided raw data.

310

## 311 **RESULTS**

### 312 *Search results and characteristics of the included studies*

313 After removing duplicates, 3652 titles were checked (Figure 1). In the remaining 130  
314 articles assessed for eligibility, 16 were included in the meta-analysis (Table 2). The  
315 studies were published between 1994 and 2019 in 10 different peer-reviewed journals.  
316 Four studies were conducted in the USA (16, 74, 75, 98), 3 in the UK (8, 15, 38),  
317 Australia (25, 31, 68), and South-Africa (30, 89, 95) and 1 in Canada (84), France (94)  
318 and New-Zealand (4).

319

### 320 *Participant's characteristics*

321 A total of 147 endurance-trained individuals are represented among the 16 included  
322 studies, with women representing only 1% of the total sample. Mean sample size was  $9 \pm$   
323  $3$  individuals per study (range 6-15). None of the included studies reported information  
324 about ethnicity. The mean age, height, body mass, body mass index,  $\dot{V}O_{2max}$  and peak  
325 power output of the participants were respectively  $27 \pm 4$  years,  $179 \pm 2$  cm,  $73 \pm 3$  kg,  
326  $23 \pm 1$  kg/m<sup>2</sup>,  $62 \pm 6$  mL/kg/min and  $389 \pm 39$  W.

327

### 328 *Characteristics of the exercise protocols*

329 Among the selected studies, 81% (n = 13) used cycling as the mode of exercise while the  
330 remaining used running (n = 3). The mean ambient temperature and relative humidity  
331 were respectively  $28 \pm 6^{\circ}\text{C}$  and  $48 \pm 10\%$ , with a mean wind speed of  $10 \pm 11$  km/h. The  
332 mean exercise duration and intensity were respectively  $79 \pm 27$  min (range 51-127 min)  
333 and  $65 \pm 13\%$  of  $\dot{V}\text{O}_{2\text{max}}$ .

334

### 335 ***Fluid consumption and exercise-induced dehydration levels***

336 Mean rates of fluid consumption in the EUH and EID conditions were respectively  $18.9 \pm$   
337  $7.5$  and  $1.0 \pm 2.0$  mL/min, representing  $0.26 \pm 0.1$  and  $0.01 \pm 0.03$  mL/kg/min. The  
338 average fluid temperature was  $17 \pm 13^{\circ}\text{C}$ . The mean end-of-exercise body mass loss was  
339  $0.5 \pm 0.4\%$  (range 1 to -0.3%) when EUH was attempted to be maintained, compared to  
340  $2.3 \pm 0.5\%$  (range 3.1 to 1.7%) with EID, for a mean difference of  $1.7 \pm 0.7\%$  (range 2.8  
341 to 0.9%) between conditions. Mean dehydration rates of  $0.007 \pm 0.005$  and  $0.03 \pm$   
342  $0.009\%$ /min were observed during the EUH and EID conditions, respectively.

343

### 344 ***Weighted mean effect summaries***

345 Figure 2a depicts the changes in RPE that occurred during exercise between the EUH and  
346 EID conditions across levels of body mass losses of 0.5, 1, 1.5, 2, 2.5 and 3%, and for  
347 absolute values of RPE which fluctuated from ~ 12 (light) to 16.5 (hard) points. Figure  
348 2b pinpoints the weighted mean difference in RPE between the EUH and EID conditions  
349 across each of these levels of body mass losses. Results of the forest plot illustrate that,  
350 compared with EUH, EID slowly increased RPE during exercise from 0.22 points (95%  
351 CI: -0.05-0.48) when body mass loss was trivial (0.5%) to 0.60 points (95% CI: 0.29-

352 0.92) when body mass loss was light (1.5%), up to 0.81 points (95% CI: 0.36-1.27) when  
353 body mass loss was moderate (3%). Only at 0.5 and 1% body mass losses were the  
354 differences in RPE between the EUH and EID conditions not significant. In none of the 6  
355 weighted mean summary effects models did the removal of each study one at a time  
356 significantly and practically impacted the outcome that body mass loss has upon RPE.  
357 For each of the EID subgroups, the practical impact of body mass loss on RPE was likely  
358 or almost certainly trivial. Distribution of point estimates around each of the 6 weighted  
359 mean effect summaries was appropriate, which indicates no publication bias. Cluster  
360 analysis indicates that heterogeneity was substantial with an  $I^2$  of 72% and a Cochran's  $Q$   
361 of 204.9,  $p < 0.01$ . At the subgroup level, substantial inconsistencies were also observed  
362 at the 0.5, 1, 1.5 and 2, but not 2.5 and 3% body mass loss levels where heterogeneity  
363 was low. When the analyses were performed without the studies that used time-trials,  
364 results were similar, with the exception that the differences in RPE between the EUH and  
365 EID condition reached 1.2 points (95% CI: 0.61-1.80) when body mass loss was  
366 moderate (3%).

367 Cluster analysis indicates that EID, on average, increases RPE by 0.45 point (95% CI:  
368 0.31-0.59, Figure 2b). Using the more intuitive approach, we observed an overall effect  
369 of 0.38 points (95% CI: 0.22-0.53,  $Q = 125.3$ ,  $p < 0.01$ ,  $I^2 = 88\%$ ). When studies that  
370 used time-trials were removed, the results were, again, extremely similar: 0.50 points  
371 (95% CI: 0.33-0.67,  $Q = 174.8$ ,  $p < 0.01$ ,  $I^2 = 77\%$ ) vs. 0.44 points (95% CI: 0.24-0.64,  $Q$   
372 = 114.2,  $p < 0.01$ ,  $I^2 = 90\%$ ) with the more intuitive approach.

373

374

*Figure 2 about here*



375

376 Figure 3a illustrates the slope estimates for the regression of RPE on the % body mass  
377 loss for each of the included studies. Figure 3b shows a forest plot combining the 16  
378 slope estimates to derive a weighted mean summary effect. Results show that for each  
379 1% body mass loss, RPE increased on average by 0.21 points (95% CI: 0.12-0.31),  
380 thereby theoretically suggesting that it is not before reaching a body mass loss of ~ 5%  
381 that EID may potentially affect RPE in a meaningful way. A sensitivity analysis revealed  
382 that the removal of each study one at a time from the model did not significantly nor  
383 practically alter the outcome of the weighted mean effect summary, with variations in the  
384 slope estimate ranging from 0.13 (95% CI: 0.06-0.20) to 0.35 points (95% CI: 0.17-0.53).  
385 Inconsistency among research observations was substantial with an  $I^2$  of 75% and a  
386 Cochran's  $Q$  of 58.99,  $p < 0.01$ . Point estimates were not equally distributed on each side  
387 of the weighted mean summary effect, thereby suggesting publication bias. A trim and  
388 fill analysis adjusting for missing studies at the left side of the mean changed the  
389 weighted mean effect summary to 0.10 points (95% CI: 0.00-0.22). When the analyses  
390 were performed without the studies that used time-trials, results showed that for each 1%  
391 body mass loss, RPE increased on average by 0.38 points (95% CI: 0.17-0.59,  $Q = 56.2$ ,  
392  $p < 0.01$ ,  $I^2 = 80\%$ ). Figure 3c depicts the relationship between RPE and % body mass  
393 loss while including all 59 study-specific data points, which violates the assumption of  
394 independence among data. Nevertheless, the weighted regression analysis provides a  
395 slope estimate (0.26 points, 95% CI: 0.10-0.42) which is congruent to the one built from  
396 combining all 16 slope estimates.

397

398 *Figure 3 about here*

399

400 ***Meta-regression analyses***

401 Figure 4 shows the relationships between the changes in slope estimates and (a)  
402 temperature, (b) humidity level, (c) exercise duration, (d) exercise intensity, (e) aerobic  
403 capacity and (f) mean heart rate difference across the different studies. Individually, none  
404 of these variables significantly correlated to the extent of changes in RPE for each 1% in  
405 body mass loss. When all these variables were combined in a multiple meta-regression  
406 model (except heart rate), the goodness of fit reached 66%. The same picture was  
407 observed using the model derived from of all 59 study-specific data points. No significant  
408 relationships were also observed between the changes in slopes estimates and absolute  
409 humidity ( $p = 0.26$ ) or the composite score of exercise stress ( $p = 0.65$ ).

410

411 *Figure 4 about here*

412

413 **DISCUSSION**

414 Despite that exercisers have access to a large and diversified arsenal of tools to monitor  
415 exercise intensity, the ability to maintain a certain speed or power output is, ultimately,  
416 tributary to RPE (26, 35, 77). On the other hand, enjoyment of exercise is an important  
417 component of participation and adherence, and the more the exercise is perceived to be  
418 strenuous, the less likely the exercise behaviour is to be maintained (33). In a sense,  
419 therefore, RPE can be considered as the “mastermind” of exercise performance or  
420 adherence. Consequently, factors susceptible to negatively impact the sense of effort

421 during exercise should be given particular attention. Albeit the current results do show  
422 that EID increases RPE (response to question #1), the effect was shown to be below our  
423 identified threshold of 1 point, at least for the included studies where the greatest level of  
424 EID reached was 3% (response to questions #2 and #3), and not moderated by key  
425 confounders or associated with changes in heart rate (response to question #4 and #5).  
426 Therefore, our results highlight for the first time that EID has a spurious effect on RPE,  
427 contrarily to what is believed.

428 It has been suggested that RPE may act as a mediator of the effect of EID on endurance  
429 performance (24, 55). This is legitimate from a physiological perspective, as the  
430 documented impact of EID on thermoregulatory, cardiovascular and metabolic functions  
431 (24, 55) should result in a higher perceived strain and, hence, RPE. However, our results  
432 including observations from cycling and running exercises conducted at clamped and  
433 self-paced intensities and under different environmental conditions show that although  
434 the change in RPE statistically relates to EID, the magnitude of the effect is unlikely to be  
435 practically meaningful until a body mass of at least 3%. Of course, the design of the  
436 present meta-analysis precludes from inferencing about the repercussion of the EID-  
437 induced increase in RPE on endurance performance. Nevertheless, we are aware of no  
438 studies which have been able to establish a decisive relationship between RPE and  
439 endurance performance. That being said, if scientists agree upon the simplistic and  
440 imperfect model indirectly linking the EID-induced increase in RPE with the decline of  
441 endurance performance, the present findings clearly dispute this assertion.

442 It is proposed that EID may reduce exercise participation/adherence in recreationally  
443 active individuals because of its impact upon RPE (36, 82). Based on urinary indices,

444 studies have suggested that 40-50% of recreationally active individuals begin exercise in  
445 a light hypohydration state (82, 91) and lose ~ 0.6% of their body mass while drinking  
446 fluid *ad libitum* during freely chosen exercise sessions (82). Furthermore, untrained  
447 individuals have lower sweat rate (69, 70) and generally an easy access to water during  
448 exercise. Regarding women, they generally have a lower sweat rate than men and drink  
449 more (sometimes more than their sweat losses) during exercise (10, 80). Therefore, it is  
450 unlikely that those individuals will reach EID levels  $\geq 3\%$  of body mass during typical  
451 physical activities and, hence, that the EID-associated increase in RPE should not be a  
452 cause for concern. Moreover, studies have reported worsened affective response when  
453 participants begin exercise in a low hypohydration state (82) or when dehydration occurs  
454 progressively during exercise (8). And it seems that the acute affective response to  
455 exercise more than the acute change in RPE relates to long-term adherence to exercise  
456 (86, 97).

457 Although it is agreed upon that the brain is the organ responsible for the regulation of  
458 RPE, whether it is centrally derived and largely independent of peripheral afferent signals  
459 (21, 64, 67, 90) or results from the integration and interpretation of afferent feedback  
460 from the peripheral machinery (5, 50, 78, 88) is debated (see (1, 49, 81, 83) for further  
461 details). If the first theory is favoured, then it follows that EID would likely not alter the  
462 ability of the brain to produce motor forward commands, termed efference copies or  
463 corollary discharges (92). It has been shown that acute EID and the associated  
464 hyperosmolality does not alter brain volume (96), potentially highlighting the fact that the  
465 cerebral cortex operates close to optimally under dehydrating conditions. On the other  
466 hand, interpreting the current results within the context of the second theory would imply

467 that EID provokes minimal homeostasis alterations, at least up to a body mass loss of 3%.  
468 This claim is reasonable given that the EID-induced increase in heart rate (~ 4 beats/min,  
469 n = 14) and core temperature (~ 0.2°C, n = 9) (both results not shown) was marginal  
470 compared with EUH.

471 There was substantial heterogeneity among research findings, as illustrated in Figure 3b.  
472 This is unremarkable given that studies used a variety of protocols within which factors  
473 known to influence RPE were present. Meta-regressions were conducted to examine the  
474 moderating effect of *a priori* selected confounders. They showed that, in isolation,  
475 neither humidity, exercise duration, exercise intensity, aerobic capacity nor ambient  
476 temperature significantly correlated to the extent of changes in RPE for each 1% of body  
477 mass loss. However, while aggregated into one model, those 5 variables explained 66%  
478 of the variance observed among the changes in RPE for each 1% of body mass loss. This  
479 figure is impressive and depicts the importance of the identified confounders in the  
480 overall moderation of the relationship between EID and RPE. Hence, it cannot be  
481 excluded that the significance of several influential variables within each of the included  
482 studies masked the ability to clearly identify the independent moderating effect of some  
483 or all of the confounders.

484 There was a trend for the change in heart rate to be associated with the change in RPE for  
485 each 1% of body mass loss. Such an observation was to be expected because EID is  
486 known to exacerbate heart rate (3) and the latter has been reported to be closely related to  
487 RPE (50). Indeed, the 6-20 Borg scale was initially developed in healthy individuals to  
488 correlate approximately with exercise heart rate. Roughly, our model indicates that for  
489 each increase in heart rate of 1 beat/min there should be an increase in RPE of 0.1 points

490 for each 1% of body mass loss. Providing that the mean change in heart rate during  
491 exercise was < 10 beats/min between EUH and EID, our observation of a lack of a  
492 meaningful effect of EID on RPE makes sense. Nevertheless, it is important to bear in  
493 mind that the relationship between heart rate and RPE is only correlational in nature, not  
494 causal (50). Indeed, research has shown that it is possible to dissociate the change in heart  
495 rate from the change in RPE (e.g., using pharmacological agents) (27, 76). Therefore, our  
496 observation of a close relationship between the changes in heart rate and RPE for a given  
497 body mass loss should not be taken as a possibility that heart rate could act as a mediator  
498 of the relationship between EID and RPE.

499 Results of this meta-analysis must be interpreted with the following considerations or  
500 limitations in mind. The literature search was limited to English and French citations;  
501 studies published in different languages may have been missed. Similarly, in the literature  
502 of concern, RPE is almost exclusively studied as a secondary outcome. This complicates  
503 study identification which may have led us to miss key studies. Validity of RPE  
504 measurement depends upon the proper instructions provided to participants (49); no  
505 studies reported on whether they dispensed such instructions. Little information is  
506 available regarding what represents a meaningful change in RPE; therefore, having used  
507 a different threshold may have modified our conclusions. While they would have  
508 provided insight into the possible mechanisms linking EID to RPE, data such as thirst  
509 sensation, changes in plasma osmolality and volume were not considered as they were  
510 reported by too few included studies. Finally, the present results apply to adults, primarily  
511 males, up to an EID level of 3% body mass and for exercise up to ~ 2 h in duration in  
512 thermoneutral to warm environments.

513 In conclusion, while from a statistical point of view, EID > 1% of body mass increases  
514 RPE, the present results suggest that its effect is unlikely to be practically meaningful  
515 under running or cycling exercise conditions until a body mass loss of at least 3% is  
516 reached.

517

## 518 **PERSPECTIVES**

519 Perceived exertion can be considered as the “mastermind” of exercise performance or  
520 adherence. Exercise-induced dehydration is generally thought to increase RPE. The  
521 greater RPE associated with EID may contribute to reducing (1) exercise performance in  
522 athletes and (2) exercise participation/adherence in recreationally active individuals.  
523 Findings of the present meta-analysis suggest that from a statistical point of view, EID >  
524 1% of body mass increases RPE. However, the effect of EID on RPE is unlikely to be  
525 practically meaningful under running or cycling exercise conditions, even at 3% of body  
526 mass loss. Thus, our results suggest that concerns about the impact of EID upon RPE and,  
527 thus, by extension, the effect of the latter on endurance performance or exercise  
528 participation/adherence seem not warranted, at least not until a body mass loss of 3%.

529

## 530 **ACKNOWLEDGMENTS**

531 The authors wish to thank the researchers who shared experimental data and provided  
532 further information.

533 No funding was received for the conduct of the work or preparation of the manuscript.

534 TAD is financially supported by the Fonds de Recherche du Québec - Santé (FRQS).

535 The results of the present study do not constitute endorsement of the product by the  
536 authors or the NSCA. The authors have no conflicts of interest to declare.

537 TAD designed the research, performed the data extraction, performed the statistical  
538 analyses, designed the tables and the figures, interpreted data, drafted and revised the  
539 manuscript. TP performed the data extraction, interpreted data, drafted and revised the  
540 manuscript. EDBG designed the research, performed the data extraction, performed the  
541 statistical analyses, designed the tables and figures, interpreted data, drafted and revised  
542 the manuscript. All authors have read and approved the final version of the manuscript.

543

#### 544 REFERENCES

- 545 1. Abbiss CR, Peiffer JJ, Meeusen R, et al. Role of ratings of perceived exertion  
546 during self-paced exercise: what are we actually measuring? *Sports medicine* 45:  
547 1235-1243, 2015.
- 548 2. Adams EL, Casa DJ, Huggins RA, et al. Heat Exposure and Hypohydration  
549 Exacerbate Physiological Strain During Load Carrying. *J Strength Cond Res* 33:  
550 727-735, 2019.
- 551 3. Adams WM, Ferraro EM, Huggins RA, et al. Influence of body mass loss on  
552 changes in heart rate during exercise in the heat: a systematic review. *The Journal*  
553 *of Strength & Conditioning Research* 28: 2380-2389, 2014.
- 554 4. Ali A, Moss C, Yoo MJY, et al. Effect of mouth rinsing and ingestion of  
555 carbohydrate solutions on mood and perceptual responses during exercise. *J Int*  
556 *Soc Sports Nutr* 14: 4, 2017.
- 557 5. Amann M, Venturelli M, Ives SJ, et al. Peripheral fatigue limits endurance  
558 exercise via a sensory feedback-mediated reduction in spinal motoneuronal  
559 output. *Journal of applied physiology* 115: 355-364, 2013.
- 560 6. Armstrong LE, Ganio MS, Casa DJ, et al. Mild Dehydration Affects Mood in  
561 Healthy Young Women. *Journal of Nutrition* 142: 382-388, 2012.
- 562 7. Arney BE, Glover R, Fusco A, et al. Comparison of rating of perceived exertion  
563 scales during incremental and interval exercise. *Kinesiology* 51: 150-157, 2019.
- 564 8. Backhouse SH, Biddle SJH and Williams C. The influence of water ingestion  
565 during prolonged exercise on affect. *Appetite* 48: 193-198, 2007.
- 566 9. Backhouse SH, Bishop NC, Biddle SJ, et al. Effect of carbohydrate and prolonged  
567 exercise on affect and perceived exertion. *Medicine and science in sports and*  
568 *exercise* 37: 1768, 2005.



- 569 10. Baker LB, Munce TA and Kenney WL. Sex differences in voluntary fluid intake  
570 by older adults during exercise. *Medicine & Science in Sports & Exercise* 37:  
571 789-796, 2005.
- 572 11. Baker LB, Ungaro CT, Sopeña BC, et al. Body map of regional vs. whole body  
573 sweating rate and sweat electrolyte concentrations in men and women during  
574 moderate exercise-heat stress. *Journal of Applied Physiology* 124: 1304-1318,  
575 2018.
- 576 12. Bardis CN, Kavouras SA, Adams J, et al. Prescribed drinking leads to better  
577 cycling performance than ad libitum drinking. *Medicine & Science in Sports &  
578 Exercise* 49: 1244-1251, 2017.
- 579 13. Barnes KA, Anderson ML, Stofan JR, et al. Normative data for sweating rate,  
580 sweat sodium concentration, and sweat sodium loss in athletes: An update and  
581 analysis by sport. *Journal of Sports Sciences* 37: 2356-2366, 2019.
- 582 14. Barr SI, Costill DL and Fink WJ. Fluid replacement during prolonged exercise:  
583 effects of water, saline, or no fluid. *Med Sci Sports Exerc* 23: 811-817, 1991.
- 584 15. Barwood MJ, Goodall S and Bateman J. The effect of hot and cold drinks on  
585 thermoregulation, perception, and performance: the role of the gut in  
586 thermoreception. *Eur J Appl Physiol* 118: 2643-2654, 2018.
- 587 16. Below PR, Mora-Rodriguez R, Gonzalez-Alonso J, et al. Fluid and carbohydrate  
588 ingestion independently improve performance during 1 h of intense exercise. / L '  
589 ingestion d ' hydrate de carbone et de boisson augmente independamment la  
590 performance pendant 1h dexercice physique intense. *Medicine & Science in  
591 Sports & Exercise* 27: 200-210, 1995.
- 592 17. Berkulo MA, Bol S, Levels K, et al. Ad-libitum drinking and performance during  
593 a 40-km cycling time trial in the heat. *Eur J Sport Sci* 16: 213-220, 2016.
- 594 18. Borenstein M, Hedges LV, Higgins JP, et al. Introduction to meta-analysis.  
595 *West Sussex, England: John Wiley & Sons Ltd*, 2009.
- 596 19. Borg G. Perceived exertion as an indicator of somatic stress. *Scandinavian  
597 journal of rehabilitation medicine*, 1970.
- 598 20. Borg GA. Psychophysical bases of perceived exertion. *Medicine & science in  
599 sports & exercise*, 1982.
- 600 21. Cafarelli E. Peripheral contributions to the perception of effort. *Medicine and  
601 science in sports and exercise* 14: 382-389, 1982.
- 602 22. Chapman CL, Johnson BD, Vargas NT, et al. Both hyperthermia and dehydration  
603 during physical work in the heat contribute to the risk of acute kidney injury.  
604 *Journal of Applied Physiology* 128: 715-728, 2020.
- 605 23. Chevront S and Kenefick R. Dehydration: physiology, assessment, and  
606 performance effects. *Compr Physiol* 4: 257-285. 2014.
- 607 24. Chevront SN, Kenefick RW, Montain SJ, et al. Mechanisms of aerobic  
608 performance impairment with heat stress and dehydration. *J Appl Physiol (1985)*  
609 109: 1989-1995, 2010.
- 610 25. Costa RJ, Camões-Costa V, Snipe RM, et al. Impact of exercise-induced  
611 hypohydration on gastrointestinal integrity, function, symptoms, and systemic  
612 endotoxin and inflammatory profile. *Journal of Applied Physiology* 126: 1281-  
613 1291, 2019.

- 614 26. Crewe H, Tucker R and Noakes TD. The rate of increase in rating of perceived  
615 exertion predicts the duration of exercise to fatigue at a fixed power output in  
616 different environmental conditions. *European journal of applied physiology* 103:  
617 569, 2008.
- 618 27. Davies CT and Sargeant AJ. The effects of atropine and practolol on the  
619 perception of exertion during treadmill exercise. *Ergonomics* 22: 1141-1146,  
620 1979.
- 621 28. Dion T, Savoie FA, Asselin A, et al. Half-marathon running performance is not  
622 improved by a rate of fluid intake above that dictated by thirst sensation in trained  
623 distance runners. *European journal of applied physiology* 113: 3011-3020, 2013.
- 624 29. Doherty M and Smith P. Effects of caffeine ingestion on rating of perceived  
625 exertion during and after exercise: a meta-analysis. *Scandinavian journal of*  
626 *medicine & science in sports* 15: 69-78, 2005.
- 627 30. Dugas J, Oosthuizen U, Tucker R, et al. Rates of fluid ingestion alter pacing but  
628 not thermoregulatory responses during prolonged exercise in hot and humid  
629 conditions with appropriate convective cooling. *European journal of applied*  
630 *physiology* 105: 69, 2009.
- 631 31. Ebert TR, Martin DT, Bullock N, et al. Influence of hydration status on  
632 thermoregulation and cycling hill climbing. *Medicine & Science in Sports &*  
633 *Exercise* 39: 323-329, 2007.
- 634 32. Ekkekakis P and Lind E. Exercise does not feel the same when you are  
635 overweight: the impact of self-selected and imposed intensity on affect and  
636 exertion. *International journal of obesity* 30: 652-660, 2006.
- 637 33. Emad M, Neumann DL and Abel L. Attentional focus strategies used by regular  
638 exercisers and their relationship with perceived exertion, enjoyment, and  
639 satisfaction. *2017* 12: 13, 2017.
- 640 34. Erkmen N, Taskin H, Kaplan T, et al. Balance performance and recovery after  
641 exercise with water intake, sport drink intake and no fluid. *Journal of Exercise*  
642 *Science & Fitness* 8: 105-112, 2010.
- 643 35. Eston R, Faulkner J, St Clair Gibson A, et al. The effect of antecedent fatiguing  
644 activity on the relationship between perceived exertion and physiological activity  
645 during a constant load exercise task. *Psychophysiology* 44: 779-786, 2007.
- 646 36. Evans G, Maughan R and Shirreffs S. Effects of an Active Lifestyle on Water  
647 Balance and Water Requirements, in: *Lifestyle Medicine*. MR James, ed., 2019,  
648 pp 135-143.
- 649 37. Fallowfield JL, Williams C, Booth J, et al. Effect of water ingestion on endurance  
650 capacity during prolonged running. *Journal of sports sciences* 14: 497-502, 1996.
- 651 38. Funnell MP, Mears SA, Bergin-Taylor K, et al. Blinded and unblinded  
652 hypohydration similarly impair cycling time trial performance in the heat in  
653 trained cyclists. *J Appl Physiol (1985)* 126: 870-879, 2019.
- 654 39. Ganio MS, Armstrong LE, Casa DJ, et al. Mild dehydration impairs cognitive  
655 performance and mood of men. *British Journal of Nutrition* 106: 1535-1543,  
656 2011.
- 657 40. Ganio MS, Wingo JE, Carroll CE, et al. Fluid ingestion attenuates the decline in  
658 VO<sub>2</sub>peak associated with cardiovascular drift. *Med Sci Sports Exerc* 38: 901-909,  
659 2006.

- 660 41. Garcin M, Wolff M and Bejma T. Reliability of rating scales of perceived exertion  
661 and heart rate during progressive and maximal constant load exercises till  
662 exhaustion in physical education students. *International journal of sports*  
663 *medicine* 24: 285-290, 2003.
- 664 42. Gava Pompermayer M, Rodrigues R, Manfredini Baroni B, et al. Rehydration  
665 during exercise in the heat reduces physiological strain index in healthy adults. /  
666 Reidratação durante exercício no calor reduz o índice de esforço isiológico em  
667 adultos saudáveis. *Brazilian Journal of Kineanthropometry & Human*  
668 *Performance* 16: 629-637, 2014.
- 669 43. Gonzalez-Alonso J, Mora-Rodriguez R, Below P, et al. Dehydration reduces  
670 cardiac output and increases systemic and cutaneous vascular resistance during  
671 exercise. *Journal of Applied Physiology* 79: 1487-1496, 1995.
- 672 44. Goodman SP and Marino FE. Thirst perception exacerbates objective mental  
673 fatigue. *Neuropsychologia* 150: 107686, 2021.
- 674 45. Goodman SP, Moreland AT and Marino FE. The effect of active hypohydration on  
675 cognitive function: a systematic review and meta-analysis. *Physiology & behavior*  
676 204: 297-308, 2019.
- 677 46. Goulet ED. Effect of exercise-induced dehydration on time-trial exercise  
678 performance: a meta-analysis. *British journal of sports medicine* 45: 1149-1156,  
679 2011.
- 680 47. Goulet ED. Effect of exercise-induced dehydration on endurance performance:  
681 evaluating the impact of exercise protocols on outcomes using a meta-analytic  
682 procedure. *British journal of sports medicine* 47: 679-686, 2013.
- 683 48. Goulet ED and Hoffman MD. Impact of ad libitum versus programmed drinking  
684 on endurance performance: A systematic review with meta-analysis. *Sports*  
685 *Medicine* 49: 221-232, 2019.
- 686 49. Halperin I and Emanuel A. Rating of perceived effort: Methodological concerns  
687 and future directions. *Sports Medicine*: 1-9, 2020.
- 688 50. Hampson DB, St Clair Gibson A, Lambert MI, et al. The influence of sensory  
689 cues on the perception of exertion during exercise and central regulation of  
690 exercise performance. *Sports Med* 31: 935-952, 2001.
- 691 51. Hashimoto H, Ishijima T, Suzuki K, et al. The effect of the menstrual cycle and  
692 water ingestion on physiological responses during prolonged exercise at moderate  
693 intensity under hot conditions. *J Sports Med Phys Fitness*, 2016.
- 694 52. Higgins J, Altman D and Sterne A. Cochrane Handbook for Systematic Reviews  
695 of Interventions. *Version 5*, 2011.
- 696 53. Hillman AR, Vince RV, Taylor L, et al. Exercise-induced dehydration with and  
697 without environmental heat stress results in increased oxidative stress. *Applied*  
698 *Physiology, Nutrition & Metabolism* 36: 698-706, 2011.
- 699 54. Ishijima T, Hashimoto H, Satou K, et al. The different effects of fluid with and  
700 without carbohydrate ingestion on subjective responses of untrained men during  
701 prolonged exercise in a hot environment. *J Nutr Sci Vitaminol (Tokyo)* 55: 506-  
702 510, 2009.
- 703 55. James LJ, Funnell MP, James RM, et al. Does hypohydration really impair  
704 endurance performance? Methodological considerations for interpreting hydration  
705 research. *Sports Medicine*: 1-12, 2019.

- 706 56. James LJ, Moss J, Henry J, et al. Hypohydration impairs endurance performance:  
707 a blinded study. *Physiol Rep* 5, 2017.
- 708 57. Jüni P, Witschi A, Bloch R, et al. The hazards of scoring the quality of clinical  
709 trials for meta-analysis. *Jama* 282: 1054-1060, 1999.
- 710 58. Lamb KL, Eston RG and Corns D. Reliability of ratings of perceived exertion  
711 during progressive treadmill exercise. *Br J Sports Med* 33: 336-339, 1999.
- 712 59. Lambert GP, Lang J, Bull A, et al. Fluid restriction during running increases GI  
713 permeability. *International journal of sports medicine* 29: 194-198, 2008.
- 714 60. Larose J, Boulay P, Sigal RJ, et al. Age-related decrements in heat dissipation  
715 during physical activity occur as early as the age of 40. *PLoS One* 8: e83148,  
716 2013.
- 717 61. Lee M, Hammond K, Vasdev A, et al. Self-selecting fluid intake while  
718 maintaining high carbohydrate availability does not impair half-marathon  
719 performance. *International journal of sports medicine* 35: 1216-1222, 2014.
- 720 62. Logan-Sprenger HM, Heigenhauser GJF, Jones GL, et al. Increase in Skeletal-  
721 Muscle Glycogenolysis and Perceived Exertion With Progressive Dehydration  
722 During Cycling in Hydrated Men. *International Journal of Sport Nutrition &*  
723 *Exercise Metabolism* 23: 220-229, 2013.
- 724 63. Logan-Sprenger HM, Heigenhauser GJF, Killian KJ, et al. Effects of dehydration  
725 during cycling on skeletal muscle metabolism in females. *Medicine and science in*  
726 *sports and exercise* 44: 1949-1957, 2012.
- 727 64. Marcora S. Perception of effort during exercise is independent of afferent  
728 feedback from skeletal muscles, heart, and lungs. *J Appl Physiol (1985)* 106:  
729 2060-2062, 2009.
- 730 65. Maughan RJ, Shirreffs SM and Leiper JB. Errors in the estimation of hydration  
731 status from changes in body mass. *Journal of sports sciences* 25: 797-804, 2007.
- 732 66. Maughan RJ, Watson P and Shirreffs SM. Implications of active lifestyles and  
733 environmental factors for water needs and consequences of failure to meet those  
734 needs. *Nutr Rev* 73 Suppl 2: 130-140, 2015.
- 735 67. McCloskey D. Corollary discharge and motor commands and perception.  
736 *Handbook of physiology*, 1981.
- 737 68. McConell GK, Stephens TJ and Canny BJ. Fluid ingestion does not influence  
738 intense 1-h exercise performance in a mild environment. *Med Sci Sports Exerc*  
739 31: 386-392, 1999.
- 740 69. Merry T, Ainslie P and Cotter J. Effects of aerobic fitness on  
741 hypohydration-induced physiological strain and exercise impairment. *Acta*  
742 *physiologica* 198: 179-190, 2010.
- 743 70. Merry TL, Ainslie PN, Walker R, et al. Fitness alters fluid regulatory but not  
744 behavioural responses to hypohydrated exercise. *Physiol Behav* 95: 348-352,  
745 2008.
- 746 71. Montain SJ and Coyle EF. Influence of graded dehydration on hyperthermia and  
747 cardiovascular drift during exercise. *Journal of applied physiology* 73: 1340-  
748 1350, 1992.
- 749 72. Mudambo KSMT, Leese GP and Rennie MJ. Dehydration in soldiers during  
750 walking/running exercise in the heat and effects of fluid ingestion during and after

- 751 exercise. *European Journal of Applied Physiology & Occupational Physiology*  
752 76: 517-524, 1997.
- 753 73. Muhamed AMC, Yusof HA, Stannard SR, et al. The Efficacy of Ingesting Water  
754 on Thermoregulatory Responses and Running Performance in a Warm-Humid  
755 Condition. *Frontiers in physiology* 10, 2019.
- 756 74. Muñoz CX, Carney KR, Schick MK, et al. Effects of oral rehydration and  
757 external cooling on physiology, perception, and performance in hot, dry climates.  
758 *Scand J Med Sci Sports* 22: e115-124, 2012.
- 759 75. Murray SR, Michael TJ and McClellan PD. The influence of fluid replacement  
760 rate on heart rate and RPE during exercise in a hot, humid environment. *Journal*  
761 *of Strength & Conditioning Research (Allen Press Publishing Services Inc)* 9:  
762 251-254, 1995.
- 763 76. Myers J, Atwood JE, Sullivan M, et al. Perceived exertion and gas exchange after  
764 calcium and beta-blockade in atrial fibrillation. *J Appl Physiol (1985)* 63: 97-104,  
765 1987.
- 766 77. Noakes TD. Rating of perceived exertion as a predictor of the duration of exercise  
767 that remains until exhaustion. *British Journal of Sports Medicine* 42: 623-624,  
768 2008.
- 769 78. Noble BJ. Perceived exertion. *Humankinetics, Champaign, IL*: 115-117, 1996.
- 770 79. Nuccio RP, Barnes KA, Carter JM, et al. Fluid Balance in Team Sport Athletes  
771 and the Effect of Hypohydration on Cognitive, Technical, and Physical  
772 Performance. *Sports Med* 47: 1951-1982, 2017.
- 773 80. O'Neal E, Poulos S and Bishop P. Hydration profile and influence of beverage  
774 contents on fluid intake by women during outdoor recreational walking. *European*  
775 *journal of applied physiology* 112: 3971-3982, 2012.
- 776 81. Pageaux B. Perception of effort in exercise science: definition, measurement and  
777 perspectives. *European Journal of Sport Science* 16: 885-894, 2016.
- 778 82. Peacock OJ, Stokes K and Thompson D. Initial hydration status, fluid balance, and  
779 psychological affect during recreational exercise in adults. *Journal of sports*  
780 *sciences* 29: 897-904, 2011.
- 781 83. Pereira G, Souza DMD, Reichert FF, et al. Evolution of perceived exertion  
782 concepts and mechanisms: a literature review. *Revista Brasileira de*  
783 *Cineantropometria & Desempenho Humano* 16: 579-587, 2014.
- 784 84. Perreault-Briere M, Beliveau J, Jeker D, et al. Effect of Thirst-Driven Fluid Intake  
785 on 1 H Cycling Time-Trial Performance in Trained Endurance Athletes. *Sports*  
786 *(Basel)* 7, 2019.
- 787 85. Peters JL and Mengersen KL. Meta-analysis of repeated measures study designs.  
788 *J Eval Clin Pract* 14: 941-950, 2008.
- 789 86. Rhodes RE and Kates A. Can the affective response to exercise predict future  
790 motives and physical activity behavior? A systematic review of published  
791 evidence. *Annals of Behavioral medicine* 49: 715-731, 2015.
- 792 87. Riebe D, Ehrman JK, Liguori G, et al. *ACSM's guidelines for exercise testing and*  
793 *prescription*. Wolters Kluwer, 2018.
- 794 88. Robertson RJ and Noble BJ. Perception of physical exertion: Methods, mediators,  
795 and applications. *Exercise and sport sciences reviews* 25: 407-452, 1997.

- 796 89. Robinson TA, Hawley JA, Palmer GS, et al. Water ingestion does not improve 1-  
797 h cycling performance in moderate ambient temperatures. *Eur J Appl Physiol*  
798 *Occup Physiol* 71: 153-160, 1995.
- 799 90. Smirmaul Bde P. Sense of effort and other unpleasant sensations during exercise:  
800 clarifying concepts and mechanisms. *Br J Sports Med* 46: 308-311, 2012.
- 801 91. Stover EA, Petrie HJ, Passe D, et al. Urine specific gravity in exercisers prior to  
802 physical training. *Applied Physiology, Nutrition & Metabolism* 31: 320-327,  
803 2006.
- 804 92. Straka H, Simmers J and Chagnaud BP. A New Perspective on Predictive Motor  
805 Signaling. *Curr Biol* 28: R232-r243, 2018.
- 806 93. Thiel C, Pfeifer K and Sudeck G. Pacing and perceived exertion in endurance  
807 performance in exercise therapy and health sports. *German Journal of Exercise*  
808 *and Sport Research* 48: 136-144, 2018.
- 809 94. Vallier JM, Grego F, Basset F, et al. Effect of fluid ingestion on neuromuscular  
810 function during prolonged cycling exercise. *Br J Sports Med* 39: e17, 2005.
- 811 95. Walsh RM, Noakes TD, Hawley JA, et al. Impaired high-intensity cycling  
812 performance time at low levels of dehydration. *Int J Sports Med* 15: 392-398,  
813 1994.
- 814 96. Watson P, Head K, Pitiot A, et al. Effect of exercise and heat-induced  
815 hypohydration on brain volume. *Med Sci Sports Exerc* 42: 2197-2204, 2010.
- 816 97. Williams DM, Dunsiger S, Ciccolo JT, et al. Acute affective response to a  
817 moderate-intensity exercise stimulus predicts physical activity participation 6 and  
818 12 months later. *Psychology of sport and exercise* 9: 231-245, 2008.
- 819 98. Wingo J, Lafrenz A, Ganio M, et al. Cardiovascular drift is related to reduced  
820 maximal oxygen uptake during heat stress. *Medicine & Science in Sports &*  
821 *Exercise* 37: 248-255, 2005.
- 822 99. Wittbrodt MT, Millard-Stafford M, Sherman RA, et al. Fluid Replacement  
823 Attenuates Physiological Strain Resulting From Mild Hypohydration Without  
824 Impacting Cognitive Performance. *Int J Sport Nutr Exerc Metab* 25: 439-447,  
825 2015.
- 826

827

828

829

830

831

832

833

834

835

836

837 **Tables**

838

**Table 1.** Classification of percent body mass losses.

| Classification |       |                |
|----------------|-------|----------------|
| From           | to    | corresponds to |
| 0.26           | 0.75% | 0.5%           |
| 0.76           | 1.25% | 1.0%           |
| 1.26           | 1.75% | 1.5%           |
| 1.76           | 2.25% | 2.0%           |
| 2.26           | 2.75% | 2.5%           |
| 2.76           | 3.25% | 3.0%           |

839

840

841

842

843 **Table 2.** Summary of characteristics of included studies.

| References                                                                       | Participants: n<br>(women), age<br>(years), $\dot{V}O_{2max}$<br>(mL/kg/min) | Protocol: total                                                                                                                     |                       | Fluid intake<br>(mL/kg/min) | Same time of<br>the day,<br>familiarisation,<br>same diet<br>before | Body mass loss<br>(%) <sup>\$</sup> ,<br>dehydration<br>rate (% body<br>mass loss/min) <sup>\$</sup> | RPE measurement |
|----------------------------------------------------------------------------------|------------------------------------------------------------------------------|-------------------------------------------------------------------------------------------------------------------------------------|-----------------------|-----------------------------|---------------------------------------------------------------------|------------------------------------------------------------------------------------------------------|-----------------|
|                                                                                  |                                                                              | duration (min),<br>exercise mode,<br>temperature (°C),<br>relative humidity<br>(%), wind speed<br>(km/h), fluid<br>temperature (°C) |                       |                             |                                                                     |                                                                                                      |                 |
| <b>Studies that evaluated perceived exertion during fixed intensity exercise</b> |                                                                              |                                                                                                                                     |                       |                             |                                                                     |                                                                                                      |                 |
| Backhouse et al. (2007) (8)                                                      | 15 (0) endurance-trained, 21, 65                                             | 90, running at 70% $\dot{V}O_{2max}$ , 20, 47, 0, 10                                                                                | EUH: 0.14<br>EID: 0.0 | Yes, no, yes                | At the end of<br>90 min:<br>EUH: 1.4,<br>0.016<br>EID: 2.7, 0.030   | Borg 6-20 scale,<br>reported every 20<br>min.<br>No differences.                                     |                 |
|                                                                                  |                                                                              | Only 60 min<br>included in the                                                                                                      |                       |                             |                                                                     |                                                                                                      |                 |



|                            |                                                        |                                                                                                                                                               |                        |               |                                                                   |                                                                                             |
|----------------------------|--------------------------------------------------------|---------------------------------------------------------------------------------------------------------------------------------------------------------------|------------------------|---------------|-------------------------------------------------------------------|---------------------------------------------------------------------------------------------|
|                            |                                                        | analysis because                                                                                                                                              |                        |               |                                                                   |                                                                                             |
|                            |                                                        | body mass loss >1%                                                                                                                                            |                        |               | At 60 min <sup>#</sup> :                                          |                                                                                             |
|                            |                                                        | at 80 min in EUH <sup>#</sup> .                                                                                                                               |                        |               | EUH: 0.9                                                          |                                                                                             |
|                            |                                                        |                                                                                                                                                               |                        |               | DEH: 1.8                                                          |                                                                                             |
| Barwood et al. (2018) (15) | 10 (0) non-heat acclimatised trained cyclists, 25, 60* | 60+5, cycling at 55% P <sub>max</sub> (59% $\dot{V}O_{2max}$ ) followed by 80% P <sub>max</sub> (90% $\dot{V}O_{2max}$ ) time to exhaustion, 34, 34, 10.1, 27 | EUH: 0.20<br>EID: 0.0  | Yes, no, yes  | At the end of the performance: EUH: 0.9, 0.014<br>EID: 2.1, 0.033 | Borg 6-20 scale, reported every 15 min.<br>No differences.<br>Raw data provided by authors. |
| Below et al. (1995) (16)   | 8 (0) endurance trained, 23, 63                        | 50+11, cycling at 80% of $\dot{V}O_{2max}$                                                                                                                    | EUH: 0.31<br>EID: 0.05 | Yes, yes, yes | At the end of the                                                 | Borg 6-20 scale, reported every 10                                                          |

|                          |                                              |                                                                                               |                       |              |                                                 |                                                                                                    |
|--------------------------|----------------------------------------------|-----------------------------------------------------------------------------------------------|-----------------------|--------------|-------------------------------------------------|----------------------------------------------------------------------------------------------------|
|                          |                                              | followed by a performance test at 79% $\dot{V}O_{2max}$ , 31, 54, 12.6, 38<br>Same CHO intake |                       |              | performance: EUH: 0.5, 0.008<br>EID: 1.9, 0.031 | min.<br>RPE only<br>significantly higher in EID at 40 and 50 min.                                  |
| Costa et al. (2019) (25) | 11 (0) competitive endurance runners, 34, 59 | 120, running at 70% $\dot{V}O_{2max}$ , 25, 46, 10.6, 24.7                                    | EUH: 0.18<br>EID: 0.0 | Yes, no, yes | EUH: 0.6, 0.005<br>EID: 3.1, 0.026              | Borg 6-20 scale, reported every 30 min.<br><br>RPE only<br>significantly higher in EID at 120 min. |

|                             |                                        |                                                                                                                                                                                                                                                                                                                          |                        |               |                                                                            |                                                                                                      |
|-----------------------------|----------------------------------------|--------------------------------------------------------------------------------------------------------------------------------------------------------------------------------------------------------------------------------------------------------------------------------------------------------------------------|------------------------|---------------|----------------------------------------------------------------------------|------------------------------------------------------------------------------------------------------|
| Ebert et al.<br>(2007) (31) | 8 (0) well-trained<br>cyclists, 28, 66 | 120+17, cycling at<br>53% $P_{max}$ (55%<br>$\dot{V}O_{2max}$ ) followed by<br>cycling hill-climb<br>time-to-exhaustion<br>trial at 88% $P_{max}$<br>(85% $\dot{V}O_{2max}$ ), 29,<br>37, 15, -<br>Same CHO intake<br><br>Only 120 min<br>included in the<br>analysis because<br>body mass loss >1%<br>at the end of the | EUH: 0.28<br>EID: 0.05 | Yes, yes, yes | At the end of<br>the 120 min:<br>EUH: -0.3, -<br>0.0025<br>EID: 2.5, 0.021 | Borg 6-20 scale,<br>reported every 15 min<br><br>No differences.<br>Raw data provided by<br>authors. |
|-----------------------------|----------------------------------------|--------------------------------------------------------------------------------------------------------------------------------------------------------------------------------------------------------------------------------------------------------------------------------------------------------------------------|------------------------|---------------|----------------------------------------------------------------------------|------------------------------------------------------------------------------------------------------|

---

|                                                             |                                                                           | performance in<br>EUH <sup>#</sup> .                                                                                                                    |                        |               |                                                                        |                                                                                                                                                      |
|-------------------------------------------------------------|---------------------------------------------------------------------------|---------------------------------------------------------------------------------------------------------------------------------------------------------|------------------------|---------------|------------------------------------------------------------------------|------------------------------------------------------------------------------------------------------------------------------------------------------|
| Funnell et al.<br>(2019) (38)<br>Only<br>unblinded<br>group | 7 (0) trained, non-<br>heat acclimated<br>cyclists/triathletes,<br>26, 64 | 120+15, cycling at<br>50% P <sub>max</sub> (51%<br>V̇O <sub>2max</sub> ) followed by<br>a time-trial (77%<br>V̇O <sub>2max</sub> ), 31, 48,<br>21.2, 37 | EUH: 0.23<br>EID: 0.02 | Yes, yes, yes | At the end of<br>the 120 min:<br>EUH: 0.5,<br>0.004<br>EID: 3.0, 0.025 | Borg 6-20 scale,<br>reported at 60 and 120<br>min.<br>RPE only<br>significantly higher in<br>EID at 120 min.<br><br>Raw data provided by<br>authors. |
|                                                             |                                                                           | Only 120 min<br>included in the<br>analysis because<br>body mass loss >1%<br>at the end of the                                                          |                        |               |                                                                        |                                                                                                                                                      |

---

---

|                              |                                                     | performance in<br>EUH#.                                                                                                                                          |                       |               |                                                                    |                                                                        |
|------------------------------|-----------------------------------------------------|------------------------------------------------------------------------------------------------------------------------------------------------------------------|-----------------------|---------------|--------------------------------------------------------------------|------------------------------------------------------------------------|
| McConnell et al. (1999) (68) | 8 (0) well-trained cyclists and triathletes, 26, 64 | 45+15, cycling at 80% of $\dot{V}O_{2max}$ followed by an "all-out" performance at 77% $\dot{V}O_{2max}$ , 21, 41, wind but speed not reported, room temperature | EUH: 0.31<br>EID: 0.0 | Yes, yes, yes | At the end of the performance:<br>EUH: 0.0, 0.0<br>EID: 1.9, 0.032 | Borg 6-20 scale, reported at 10, 30, 45 and 60 min.<br>No differences. |

---

|                             |                                   |                                                                                                                          |                       |               |                                                                   |                                                                                                  |
|-----------------------------|-----------------------------------|--------------------------------------------------------------------------------------------------------------------------|-----------------------|---------------|-------------------------------------------------------------------|--------------------------------------------------------------------------------------------------|
| Muñoz et al.<br>(2012) (74) | 10 (0) healthy<br>runners, 25, 60 | 90+23, running at<br>30% $\dot{V}O_{2max}$<br>followed by a 5 km<br>time-trial (72%<br>$\dot{V}O_{2max}$ ), 33, 30, 0, 7 | EUH: 0.12<br>EID: 0.0 | Yes, yes, yes | At the end of<br>90 min:<br>EUH: 0.9,<br>0.010<br>EID: 1.8, 0.020 | Borg 6-20 scale,<br>reported every 5 min.<br>No differences.<br>Raw data provided by<br>authors. |
|                             |                                   | Only 90 min<br>included in the<br>analysis because<br>body mass loss >1%<br>at the end of the<br>performance in<br>EUH#. |                       |               |                                                                   |                                                                                                  |

|                               |                                                                 |                                                                 |                       |              |                                            |                                                                                                                                                                                                           |
|-------------------------------|-----------------------------------------------------------------|-----------------------------------------------------------------|-----------------------|--------------|--------------------------------------------|-----------------------------------------------------------------------------------------------------------------------------------------------------------------------------------------------------------|
| Murray et al.<br>(1995) (75)  | 15 (0) trained, 29,<br>50                                       | 60, cycling at 50%<br>$\dot{V}O_{2max}$ , 32, 70, 0, 5          | EUH: 0.35<br>EID: 0.0 | Yes, no, -   | EUH: 0.1,<br>0.002<br>EID: 1.7, 0.028      | Borg 6-20 scale,<br>reported every 5 min.<br><br>RPE significantly<br>higher in EID than<br>EUH (5 min<br>condition) from 30 to<br>60 min. No difference<br>between EID and<br>EUH (10 min<br>condition). |
| Vallier et al.<br>(2005) (94) | 8 (0) competitive<br>trained cyclists or<br>triathletes, 31, 63 | 180, cycling at 60%<br>$\dot{V}O_{2max}$ , 20.5, 50, 9,<br>18.5 | EUH: 0.17<br>EID: 0.0 | Yes, no, yes | At the end of<br>the 180 min:<br>EUH: 2.2, | Borg 6-20 scale,<br>reported every 20<br>min.                                                                                                                                                             |

|                          |                                                                     |                                                                                                                 |                       |              |                                                                    |                                                                                                          |
|--------------------------|---------------------------------------------------------------------|-----------------------------------------------------------------------------------------------------------------|-----------------------|--------------|--------------------------------------------------------------------|----------------------------------------------------------------------------------------------------------|
|                          |                                                                     |                                                                                                                 |                       |              | 0.012                                                              |                                                                                                          |
|                          |                                                                     | Only 80 min included in the analysis because body mass loss >1% at 80 min in EUH <sup>#</sup> .                 |                       |              | EID: 4.1, 0.023                                                    | No differences. However, the increase in RPE appears earlier in EID (100 min) compared to EUH (120 min). |
|                          |                                                                     |                                                                                                                 |                       |              | At 80 min <sup>#</sup> :<br>EUH: 1.0<br>DEH: 1.8                   |                                                                                                          |
| Walsh et al. (1994) (95) | 6 (0) endurance trained competitive cyclists or triathletes, 26, 61 | 60+8, cycling at 70% $\dot{V}O_{2max}$ followed by a time to exhaustion at 90% $\dot{V}O_{2max}$ , 30, 60, 3, 5 | EUH: 0.23<br>EID: 0.0 | Yes, no, yes | At the end of the 60 min:<br>EUH: 0.2,<br>0.0033<br>EID: 1.8, 0.03 | Borg CR10 scale, reported every 10 min.<br>RPE higher in EID at 60 min only.                             |



|                                                                                       |                                                 |                                                                                                                      |                       |               |                                                                               |                                                                                                                                |
|---------------------------------------------------------------------------------------|-------------------------------------------------|----------------------------------------------------------------------------------------------------------------------|-----------------------|---------------|-------------------------------------------------------------------------------|--------------------------------------------------------------------------------------------------------------------------------|
| Wingo et al.<br>(2005) (98)                                                           | 9 (0) trained<br>cyclists, 25, 55               | 45+7, cycling at<br>64% $\dot{V}O_{2max}$<br>followed by<br>maximal test at 78%<br>$\dot{V}O_{2max}$ , 35, 40, 0, 35 | EUH: 0.47<br>EID: 0.0 | Yes, yes, -   | At the end of<br>the<br>performance:<br>EUH: 0.3,<br>0.006<br>EID: 2.5, 0.049 | Borg 6-20 scale,<br>reported at 15 and 45<br>min.<br>No differences.<br>Raw data provided by<br>authors.                       |
| <b>Studies that evaluated perceived exertion during self-paced intensity exercise</b> |                                                 |                                                                                                                      |                       |               |                                                                               |                                                                                                                                |
| Ali et al.<br>(2017) (4)                                                              | 9 (0) moderately<br>trained cyclists,<br>33, 55 | 68.5, cycling time-<br>trial at 78% $\dot{V}O_{2max}$ ,<br>19, 48, 0, 6                                              | EUH: 0.11<br>EID: 0.0 | Yes, yes, yes | EUH: 0.6,<br>0.009<br>EID: 1.9, 0.028                                         | Borg 6-20 scale,<br>reported every 25% of<br>exercise completed<br>(every 17.1 min)<br>No differences.<br>Raw data provided by |

|                                     |                                                                                                 |                                                                                                                              |                        |               |                                    |                                                                                                    |
|-------------------------------------|-------------------------------------------------------------------------------------------------|------------------------------------------------------------------------------------------------------------------------------|------------------------|---------------|------------------------------------|----------------------------------------------------------------------------------------------------|
|                                     |                                                                                                 |                                                                                                                              |                        |               |                                    | authors.                                                                                           |
| Dugas et al. (2009) (30)            | 6 (0) highly trained cyclists, 23, 77*                                                          | 127, 80 km cycling time-trial at 47% $\dot{V}O_{2max}$ , $P_{max}$ (50% $\dot{V}O_{2max}$ ), 33, 50, 37.5, - Same CHO intake | EUH: 0.32<br>EID: 0.10 | Yes, yes, yes | EUH: 0.5, 0.004<br>EID: 3.0, 0.024 | Borg CR10 scale, reported at 40 and 80 km (at 63 and 127 min).<br><br>No differences.              |
| Perreault-Brière et al. (2019) (84) | 9 (2) heat- or partially heat-acclimatized, healthy, endurance-trained competitive cyclists and | 60, cycling time-trial at 80% $\dot{V}O_{2max}$ , 30, 49, 27.5, 5                                                            | EUH: 0.37<br>EID: 0.0  | Yes, yes, yes | EUH: 0.6, 0.010<br>EID: 2.9, 0.048 | Borg 6-20 scale, reported every 5 min.<br><br>No differences.<br><br>Raw data provided by authors. |

---

triathletes, 30, 59

Women tested  
during the  
follicular phase.

|                             |                                          |                                                                   |                       |               |                                       |                                         |
|-----------------------------|------------------------------------------|-------------------------------------------------------------------|-----------------------|---------------|---------------------------------------|-----------------------------------------|
| Robinson et al. (1995) (89) | 8 (0) endurance-trained cyclists, 25, 66 | 60, cycling time-trial at 79% $\dot{V}O_{2max}$ , 20, 60, 10.8, 5 | EUH: 0.32<br>EID: 0.0 | Yes, yes, yes | EUH: 0.9,<br>0.016<br>EID: 2.3, 0.038 | Borg 6-20 scale, reported every 10 min. |
|-----------------------------|------------------------------------------|-------------------------------------------------------------------|-----------------------|---------------|---------------------------------------|-----------------------------------------|

No differences.

---

844 References are listed in alphabetical order for both sections. EID: exercise-induced dehydration (experimental condition), EUH:

845 euhydrated control condition, RPE: perceived exertion, -: missing data, \*: estimated  $\dot{V}O_{2max}$  using Hawley & Noakes (1992) equations.

846 Value of 0 was attributed when wind speed was not provided. #: indicates the % of body mass loss taken for analysis for those studies

847 in which body mass loss surpassed 1% in the EUH condition. \$: any positive value represents a body mass loss while negative values  
848 indicate body mass gain.  
849

850 **Figure legends**

851 **Figure 1.**

852 Flowchart showing the selection process used for the inclusion and exclusion of studies.

853 **Figure 2.**

854 (a) Changes in perceived exertion (means  $\pm$  SD) occurring during exercise between the  
855 control (EUH) and exercise-induced dehydration (EID) condition across levels of  
856 exercise-induced dehydration of 0.5, 1, 1.5, 2, 2.5 and 3% body mass. AU: arbitrary  
857 units. EID: exercise-induced dehydration. EUH: euhydration. (b) Forest plot showing the  
858 mean differences in perceived exertion across different levels of exercise-induced  
859 dehydration. Filled diamond symbol represents the weighted mean change in perceived  
860 exertion between conditions. Size of squares is proportional to the weight of each study.  
861 CI: confidence interval.

862 **Figure 3**

863 (a) Slope estimates for the regression of perceived exertion on the % body mass loss for  
864 each of the included studies; (b) Forest plot combining all slope estimates to derive a  
865 weighted mean summary effect; (c) Relationship between perceived exertion and % body  
866 mass loss while including all study-specific data points.

867 **Figure 4**

868 Relationships between the changes in slope estimates and (a) temperature, (b) humidity  
869 level, (c) exercise duration, (d) exercise intensity, (e) aerobic capacity ( $\dot{V}O_{2\max}$ ) and mean  
870 (f) heart rate difference across the different studies included in the meta-analysis.

871 Otherwise stated n = 16.

872

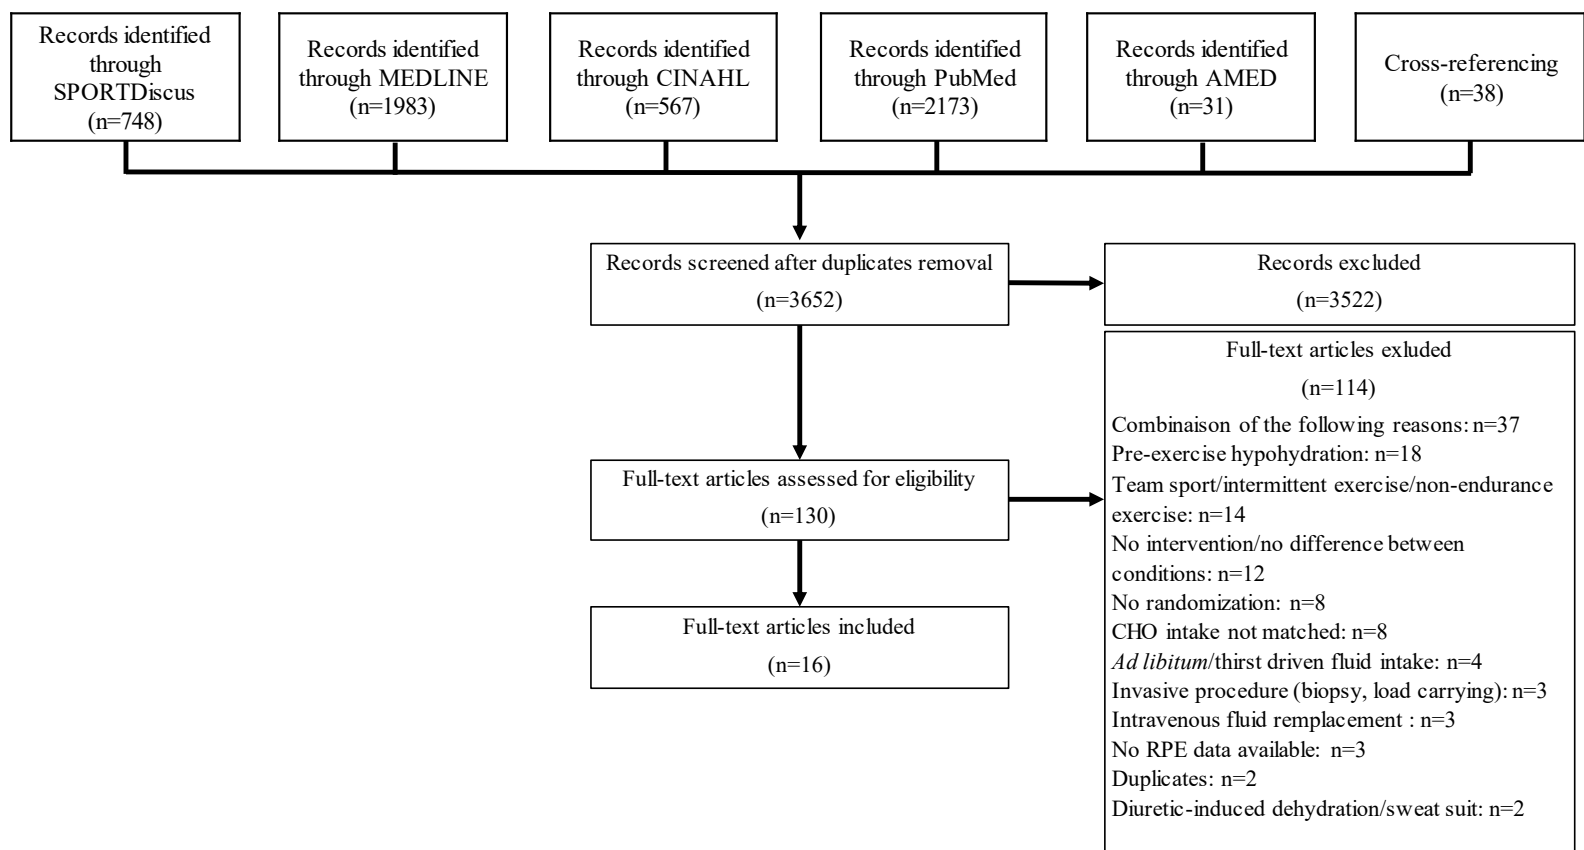

## **Impact of Exercise-induced Dehydration on Perceived Exertion During Endurance Exercise: A Systematic Review with Meta-analysis**

### **Keywords and strategy used for the research of potential studies**

|                                |                                                                                                                                                         |                   |
|--------------------------------|---------------------------------------------------------------------------------------------------------------------------------------------------------|-------------------|
| <b>Hydration (S1)</b>          | Hydrat* or Dehydrat* or Hypohydrat* or Euhydrat* or fluid or drink*                                                                                     | Title or abstract |
| <b>Perceived exertion (S2)</b> | “Perceived exertion” or “Perceived effort” or “Rate of perceived exertion” or “Rating of perceived exertion” or “RPE” or percept* or exertion or effort | Title or abstract |
| <b>Exercise (S3)</b>           | Exercise* or run* or cycl* or endurance or performance                                                                                                  | Title or abstract |
| <b>Overall research</b>        | S1 AND S2 AND S3                                                                                                                                        |                   |

*Note: Research has been done on EBSCO with 4 different databases: SPORTDiscus, CINAHL, AMED and MEDLINE. The same research was also done using PubMed. Last search: December 17, 2020*

It is made available under a [CC-BY-ND 4.0 International license](https://creativecommons.org/licenses/by-nd/4.0/).

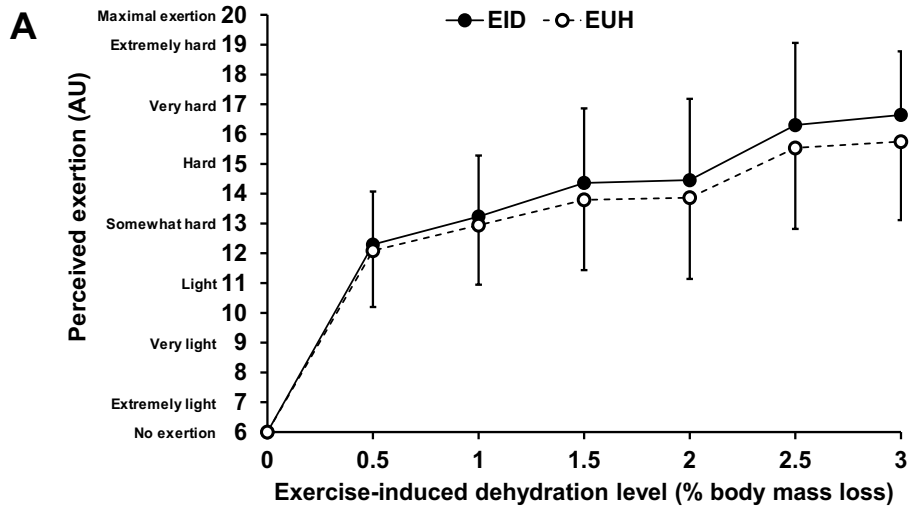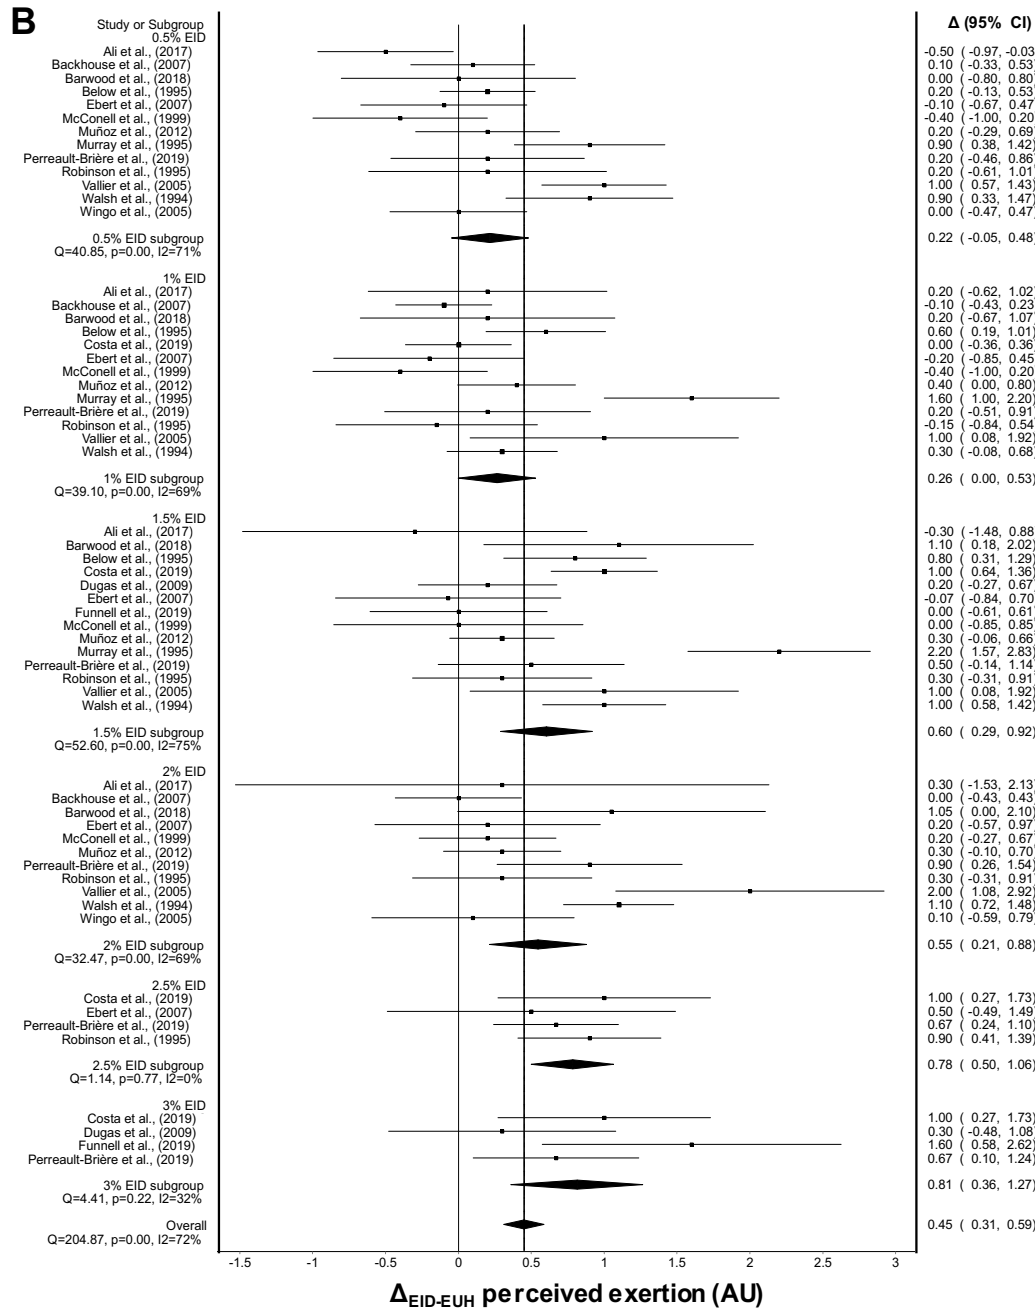



**A**

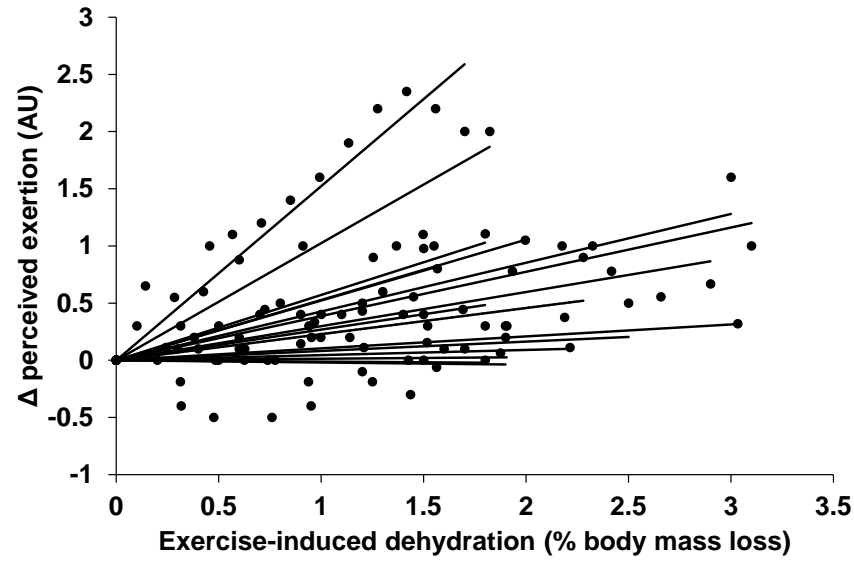

**B**

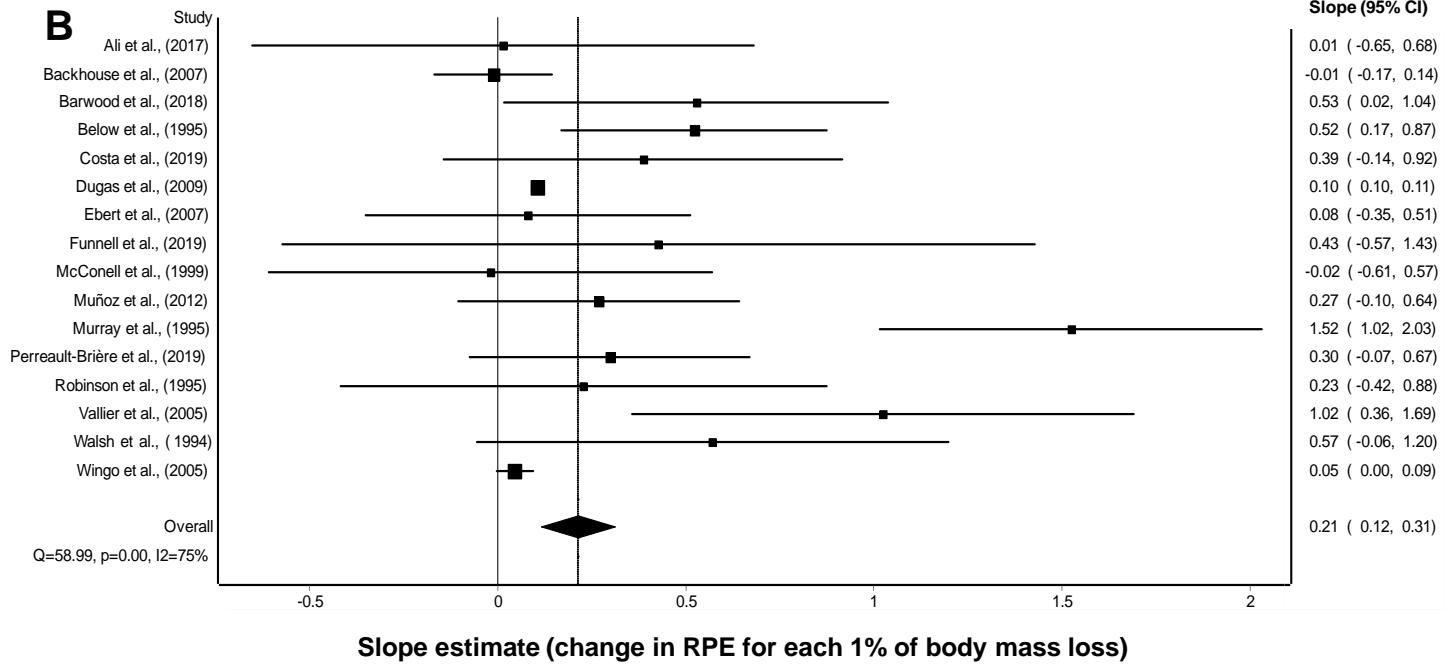

**C**

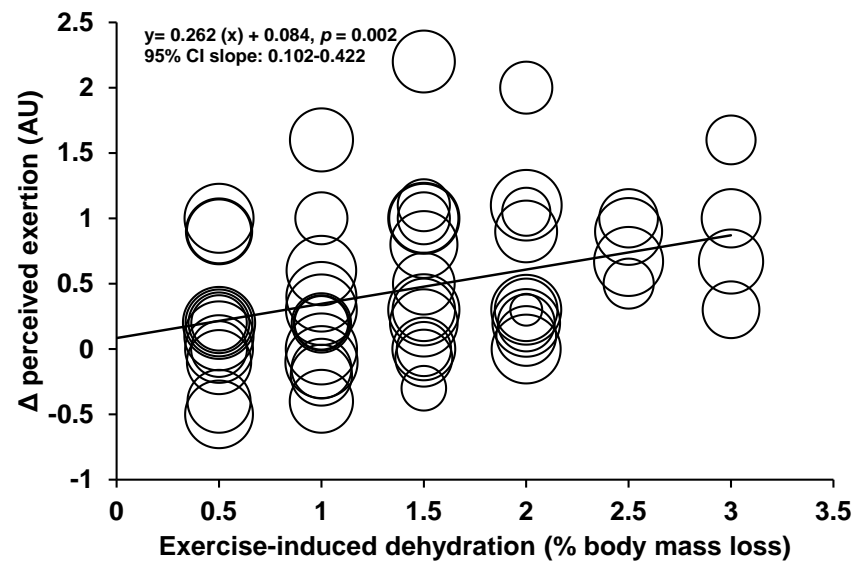

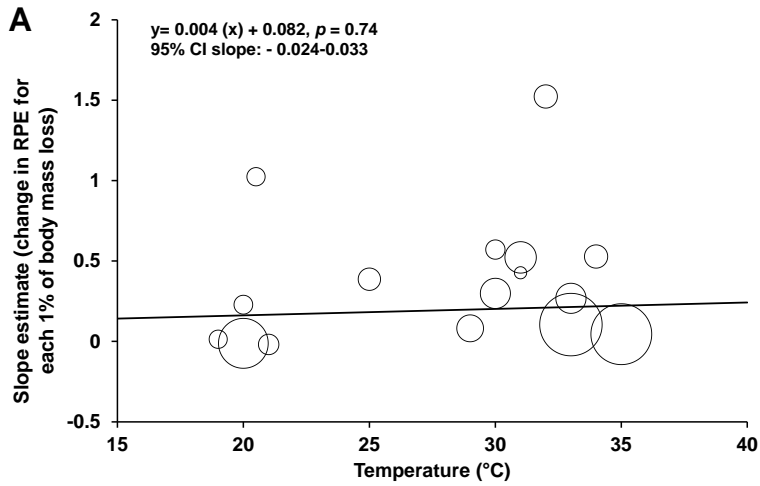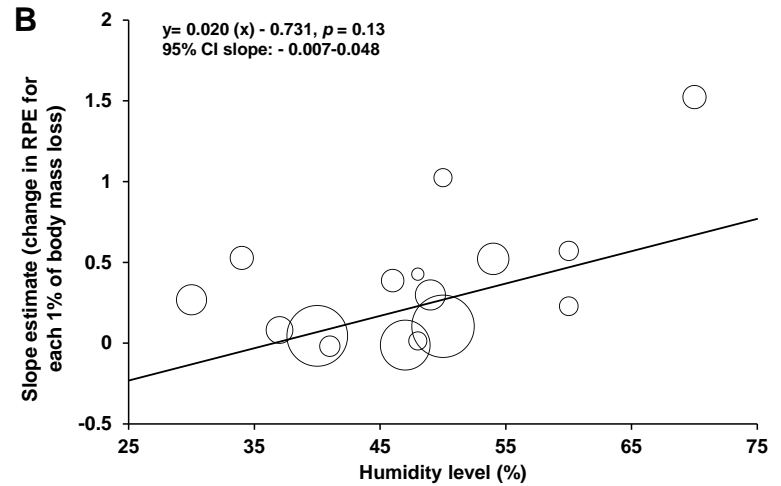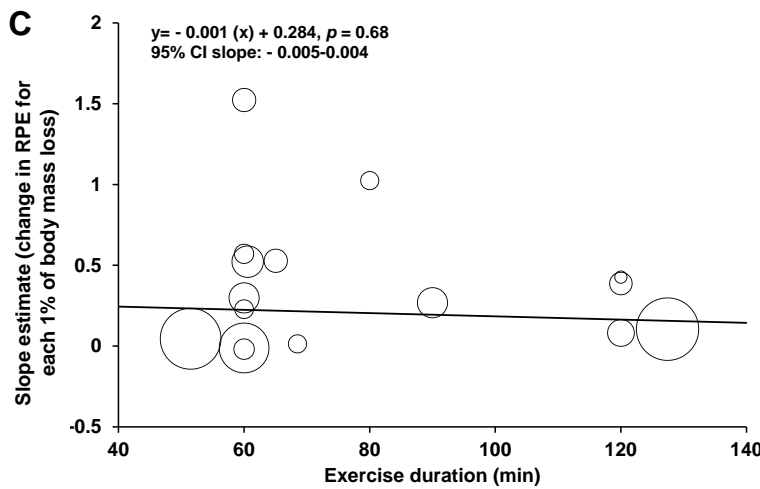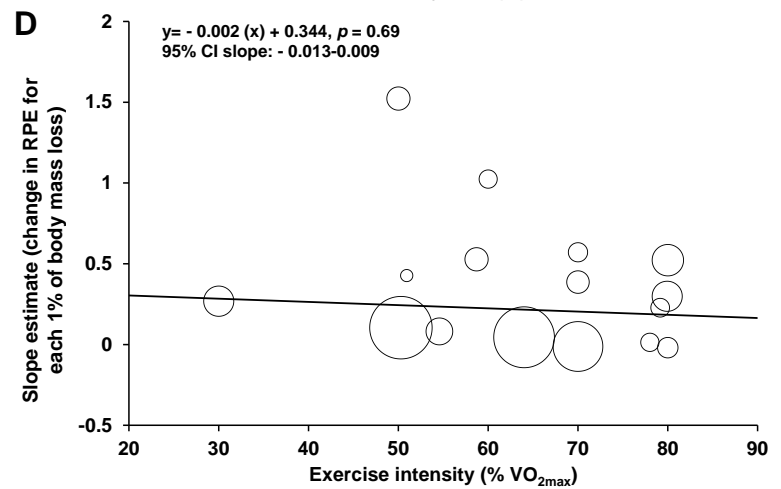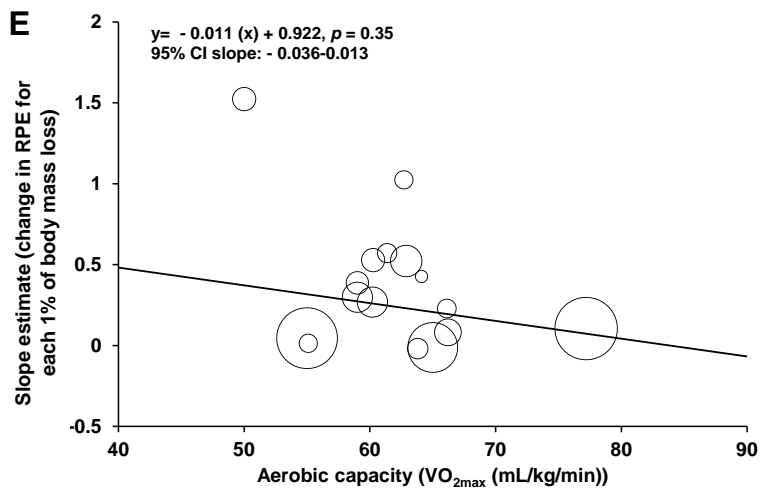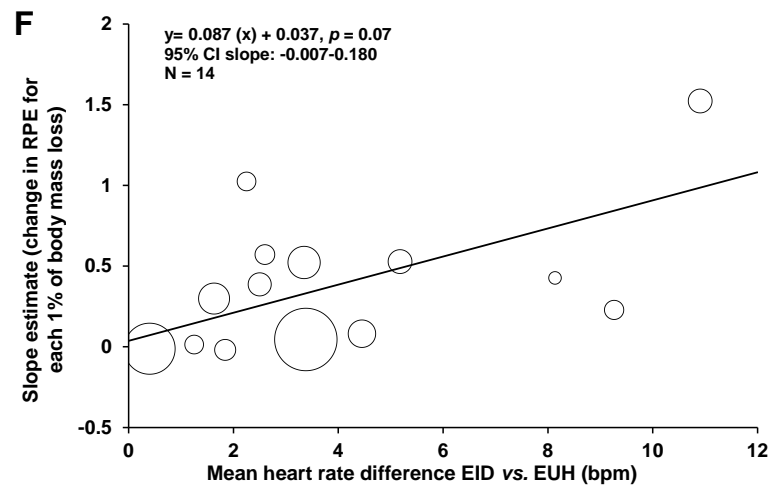

Source: https://medrxiv.org/content/10.1101/2021.11.12.21266279.full.pdf
